# Supplementary material for: Heterozygous and Homozygous Variants in SORL1 Gene in Alzheimer’s Disease Patients: Clinical, Neuroimaging and Neuropathological Findings
Source: MDPI journal article supplement (doi:10.3390/ijms23084230), 2022-04-11
Supplement: s1 [file s1]

**Supplementary Table S1.** Candidate variants identified in neurodegenerative dementia causal genes

| Patient ID | Gene          | Transcript ID | cDNA         | Protein change | ACMG classification <sup>‡</sup> | OMIM Disease            | ApoE genotype |
|------------|---------------|---------------|--------------|----------------|----------------------------------|-------------------------|---------------|
| 19NG1297   | <i>NOTCH3</i> | NM_000435.2   | c.1819C>T    | p.R607C        | Pathogenic                       | CADASIL*                | 3/3           |
| 20NG0521   | <i>MAPT</i>   | NM_001123066  | c.2194C>T    | p.P732S        | Likely Pathogenic                | Frontotemporal dementia | 3/3           |
| 19NG0814   | <i>PSEN1</i>  | NM_000021.3   | c.313T>G     | p.F105V        | Likely Pathogenic                | Alzheimer's disease     | 3/3           |
| 20NG0518   | <i>APP</i>    | NM_000484.3   | c.539G>T     | p.R180L        | VUS                              | Alzheimer's disease     | 3/3           |
| 18NG0103   | <i>APP</i>    | NM_000484.3   | c.982C>T     | p.R328W        | VUS                              | Alzheimer's disease     | 3/3           |
| 19NG0871   | <i>SQSTM1</i> | NM_003900.4   | c.436_462dup | p.P146_C154dup | VUS                              | Frontotemporal dementia | 3/3           |
| 19NG1113   | <i>NOTCH3</i> | NM_000435.2   | c.1931T>A    | p.V644D        | VUS                              | CADASIL*                | 3/3           |

\* Cerebral arteriopathy with subcortical infarcts and leukoencephalopathy

‡ VUS: variant of unknown significance
